# Supplementary material for: On the Operational Utility of Measures of Multichannel EEGs
Source: MDPI journal article supplement (doi:10.3390/e23111434), 2021-10-30
Supplement: s1 [file s1]

## Supplement Darmon et al. On the operational utility of measures of multichannel EEGs

Mathematical description of Integrated Synergy

Table S1: Mean and Standard Deviation: Signals Containing Alpha Band

Table S2: Mean and Standard Deviation: Signals with Alpha Band Removed

Table S3: Effect Size: Eyes Open v. Eyes Closed, Robust Estimator, Signals Containing Alpha Band

Table S4: Effect Size: Eyes Open v. Eyes Closed, Robust Estimator, Signals With Alpha Band Removed

Figure S1: Effect Size: Eyes Open v. Eyes Closed, Robust Estimator: (A). Alpha band present, (B). Alpha band removed

Figure S2: Difference scores for each measure (eyes open - eyes closed)

Table S5: Kendall's tau correlation: Eyes Closed, Alpha Band Present

Table S6: Kendall's tau correlation: Eyes Closed, Alpha Removed

Table S7: Kendall's tau correlation: Eyes Open, Alpha Band Present

Table S8: Kendall's tau correlation: Eyes Open, Alpha Band Removed

Figure S3: Within-subject association alpha component present

Figure S4: Within-subject association alpha component removed

### Mathematical Description Integrated Synergy

Let  $\mathcal{P}$  be a particular partition of the state vector  $\mathbf{V} = (V_1, \dots, V_d)$  into  $r$  state vectors  $(\mathbf{M}^{(1)}, \mathbf{M}^{(2)}, \dots, \mathbf{M}^{(r)})$ . Then the integrated synergy  $\psi_1$  is defined as the decrease in the mutual information between the most-recent past and present of the system when using a partition of the most-recent past that maximizes a certain notion of non-redundant information between the partition elements and the present,

$$\psi_1 = I[\mathbf{V}_{t-1} \wedge \mathbf{V}_t] - \max_{\mathcal{P}} I_{\cup} \left[ \left( \mathbf{M}_{t-1}^{(1)}, \dots, \mathbf{M}_{t-1}^{(r)} \right) \wedge \mathbf{V}_t \right], \quad (1)$$

where  $I_{\cup} \left[ \left( \mathbf{M}_{t-1}^{(1)}, \dots, \mathbf{M}_{t-1}^{(r)} \right) \wedge \mathbf{V}_t \right]$  is the intersection information between a particular partition of  $\mathbf{V}_{t-1}$  and  $\mathbf{V}_t$  (Mediano, et al.). The intersection information is defined via an inclusion-exclusion principle as

$$I_{\cup} \left[ \left( \mathbf{M}_{t-1}^{(1)}, \dots, \mathbf{M}_{t-1}^{(r)} \right) \wedge \mathbf{V}_t \right] = \sum_{\mathcal{S} \in \mathcal{P}^+(\{\mathbf{M}^{(1)}, \dots, \mathbf{M}^{(r)}\})} (-1)^{|\mathcal{S}|+1} I_{\cap} \left[ \left( \mathbf{S}_{t-1}^{(1)}, \dots, \mathbf{S}_{t-1}^{(|\mathcal{S}|)} \right) \wedge \mathbf{V}_t \right]. \quad (2)$$

where  $\mathcal{P}^+(\{\mathbf{M}^{(1)}, \dots, \mathbf{M}^{(r)}\})$  is the power set of  $\{\mathbf{M}^{(1)}, \dots, \mathbf{M}^{(r)}\}$  excluding the empty set and  $I_{\cap} \left[ \left( \mathbf{S}_{t-1}^{(1)}, \dots, \mathbf{S}_{t-1}^{(|\mathcal{S}|)} \right) \wedge \mathbf{V}_t \right]$  is the intersection information, i.e. the redundant information, between a subset  $\mathcal{S}$  of the partition and  $\mathbf{V}_t$  (Griffith).

For a linear Gaussian VAR, the union information reduces to the maximum over the mutual informations between the present state and each single element of the partition

$$I_{\cup} \left[ \left( \mathbf{M}_{t-1}^{(1)}, \dots, \mathbf{M}_{t-1}^{(r)} \right) \wedge \mathbf{V}_t \right] = \max_k I \left[ \mathbf{M}_{t-1}^{(k)} \wedge \mathbf{V}_t \right]. \quad (3)$$

(Olbrich, Bertschinger, and Rauh).

As in (Mediano, et al.), we restrict our analysis to equal-sized bipartitions of the state vector. This is done to avoid bias due to differences in integrated information between different-sized partitions.

### Order- $p$ Integrated Synergy

The integrated synergy (1) implicitly assumes that the stochastic process governing the state variable is an order-1 Markov process. That is, it assumes that knowledge of the most recent past is sufficient to predict the future of the time series. There is no reason to assume this a priori, especially for time series derived from electrophysiology. In principle, one could allow for the entire past of the time series to be necessary for optimal prediction, i.e. if the process is a linear stochastic process. In this section, we define this infinite-order integrated synergy as well as an order- $p$  compromise.

Let  $\mathbf{Z}_{a:b} = (\mathbf{Z}_a, \mathbf{Z}_{a+1}, \dots, \mathbf{Z}_{b-1})$  be the random vector containing the state vector from time points  $a$  to  $b - 1$ . Then the infinite order integrated synergy  $\psi_\infty$  is defined as

$$\psi_\infty = I[\mathbf{V}_{-\infty:t} \wedge \mathbf{V}_t] - \max_{\mathcal{P}} I_{\cup} \left[ \left( \mathbf{M}_{-\infty:t}^{(1)}, \dots, \mathbf{M}_{-\infty:t}^{(r)} \right) \wedge \mathbf{V}_t \right]. \quad (4)$$

In practice, with finite data available to estimate the time series model, finite orders are necessary. Truncating at sufficiently large lag  $p$  into the past gives the order- $p$  integrated synergy  $\psi_p$ ,

$$\psi_p = I[\mathbf{V}_{t-p:t} \wedge \mathbf{V}_t] - \max_{\mathcal{P}} I_{\cup} \left[ \left( \mathbf{M}_{t-p:t}^{(1)}, \dots, \mathbf{M}_{t-p:t}^{(r)} \right) \wedge \mathbf{V}_t \right], \quad (5)$$

where all quantities are defined as in the order-1 case with the inclusion of additional lags.

In general, a vector stochastic process that is VAR( $p$ ) overall need not be VAR( $p$ ) in any of its components (Lütkepohl), and thus infinite orders may be necessary for the  $I_{\cup} \left[ \left( \mathbf{M}_{t-p:t}^{(1)}, \dots, \mathbf{M}_{t-p:t}^{(r)} \right) \wedge \mathbf{V}_t \right]$  term. While we do not pursue this avenue here, one approach would be to take sufficiently many lags into the past based on the spectral radius of the coefficient matrix from the VAR model.

### Estimating Order-1 and Order- $p$ Integrated Synergy

In all cases, we estimate the integrated synergy using a plug-in estimate from a linear Gaussian VAR model fit to the data using ordinary least squares, using (3) or its order- $p$  generalization to compute the union information in (1) or (5). For the order- $p$  integrated synergy, the model order  $p$  is chosen using Schwarz's Bayesian Information Criterion assuming a linear Gaussian VAR model (Lütkepohl) with a maximum possible model order of  $p_{\max} = 60$ . See the Section 4.1 of (Mediano, et al.) for more details on estimating the linear Gaussian VAR and computing its associated information-theoretic properties.

### References

Griffith, V. A principled infotheoretic  $\Phi$ -like measure. arXiv: 1401.0978v3 [cs.IT]

Lütkepohl, H. New Introduction to Multiple Time Series Analysis., **2005**, New York, NY: Springer Science and Business Media.

Mediano, P.A.M., Seth, A.K. and Barrett, A.B. Measuring integrated information: comparison of candidate measures in theory and simulation. *Entropy*. **2019**, 21, 77

Olbrich, E. Bertschinger, N. and Rauh, J. Information decomposition and synergy. *Entropy* **2015**, 17, 3501-3517.

Tononi, G., Sporns, O. and Edelman, G. A measure for brain complexity: Relating functional segregation and integration in the nervous system. *Proceedings National Academy of Science (USA)* **1994**, 91(11), 5033-5037.

**Table S1. Mean and Standard Deviation  
Signals containing the alpha component**

| Measure                                                                      | Eyes Closed<br>Mean $\pm$ StDev | Eyes Open<br>Mean $\pm$ StDev |
|------------------------------------------------------------------------------|---------------------------------|-------------------------------|
| Binary Lempel Ziv<br>Signals mean normalized                                 | 174.250<br>$\pm 32.811$         | 237.667<br>$\pm 47.483$       |
| Binary Lempel Ziv<br>Signals normalized by mean<br>and by standard deviation | 188.250<br>$\pm 34.489$         | 239.500<br>$\pm 38.339$       |
| $C_N$<br>Tononi, et al. 1994<br>Equation 4                                   | 5.5095<br>$\pm 0.659$           | 4.863<br>$\pm 0.657$          |
| $\psi$ $p = 1$<br>Mediano, et al. 2019<br>Equation 23                        | 6.415<br>$\pm 0.942$            | 5.559<br>$\pm 1.017$          |
| $\psi$ $p$ via BIC<br>Mediano, et al.<br>Equation 23                         | 0.2535<br>$\pm 0.0843$          | 0.4548<br>$\pm 0.1569$        |

**Table S2. Mean and Standard Deviation  
Signals with the alpha component removed**

| Measure                                                                      | Eyes Closed<br>Mean $\pm$ StDev | Eyes Open<br>Mean $\pm$ StDev |
|------------------------------------------------------------------------------|---------------------------------|-------------------------------|
| Binary Lempel Ziv<br>Signals mean normalized                                 | 230.667<br>$\pm 47.266$         | 273.417<br>$\pm 46.800$       |
| Binary Lempel Ziv<br>Signals normalized by mean<br>and by standard deviation | 227.250<br>$\pm 38.248$         | 266.917<br>$\pm 34.935$       |
| $C_N$<br>Tononi, et al. 1994<br>Equation 4                                   | 4.8328<br>$\pm 0.760$           | 4.623<br>$\pm 0.646$          |
| $\psi$ $p = 1$<br>Mediano, et al. 2019<br>Equation 23                        | 5.687<br>$\pm 0.802$            | 5.012<br>$\pm 0.847$          |
| $\psi$ $p$ via BIC<br>Mediano, et al.<br>Equation 23                         | 0.3717<br>$\pm 0.1922$          | 0.4396<br>$\pm 0.1591$        |

**Table S3. Effect Size: Eyes Open - Eyes Closed**  
**Signals containing the alpha component, robust estimator**

| Measure                                                                      | Estimated Effect Size | 95% Confidence Interval |
|------------------------------------------------------------------------------|-----------------------|-------------------------|
| Binary Lempel Ziv<br>Signals mean normalized                                 | 1.37                  | (1.025, 2.665)          |
| Binary Lempel Ziv<br>Signals normalized by mean<br>and by standard deviation | 1.14                  | (0.881, 2.280)          |
| $C_N$<br>Tononi, et al. 1994<br>Equation 4                                   | -1.48                 | (-4.121, -0.829)        |
| $\psi$ $p = 1$<br>Mediano, et al. 2019<br>Equation 23                        | -0.75                 | (-1.537, -0.501)        |
| $\psi$ $p$ via BIC<br>Mediano, et al. 2019<br>Equation 23                    | 0.79                  | (0.233, 2.003)          |

**Table S4. Effect Size: Eyes Open - Eyes Closed**  
**Signals with the alpha component removed, robust estimator**

| Measure                                                                      | Estimated Effect Size | 95% Confidence Interval |
|------------------------------------------------------------------------------|-----------------------|-------------------------|
| Binary Lempel Ziv<br>Signals mean normalized                                 | 0.89                  | (0.269, 2.030)          |
| Binary Lempel Ziv<br>Signals normalized by mean<br>and by standard deviation | 1.63                  | (0.412, 6.783)          |
| $C_N$<br>Tononi, et al. 1994<br>Equation 4                                   | -0.28                 | (-1.035, 1.401)         |
| $\psi$ $p = 1$<br>Mediano, et al. 2019<br>Equation 23                        | -1.16                 | (-3.106, -0.344)        |
| $\psi$ $p$ via BIC<br>Mediano, et al. 2019<br>Equation 23                    | -0.03                 | (-1.015, 2.241)         |

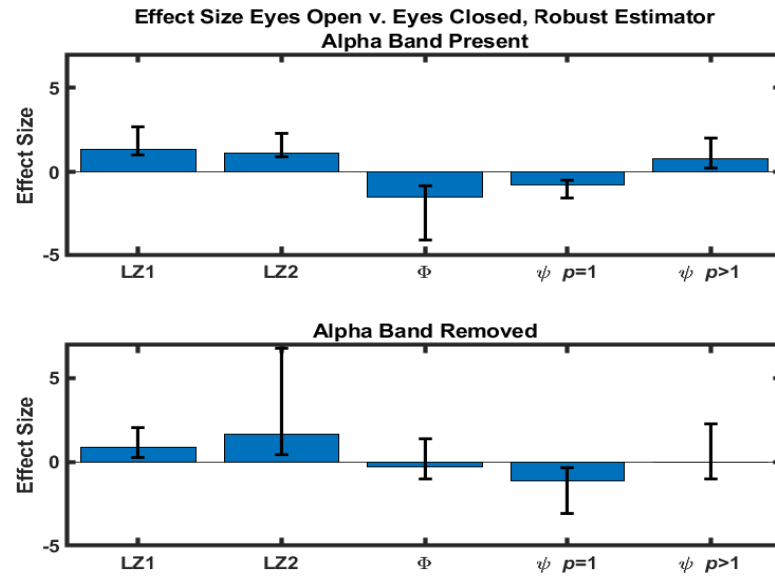

Figure S1. Eyes open versus eyes closed effect size as quantified by the robust estimator for five measures. Confidence intervals were determined with a bias-correct and adjusted bootstrap.  
 (A). Effect sizes calculated with signals that contain the alpha component.  
 (B). Effect sizes calculated after the alpha component had been removed with an 8 Hz to 13 Hz stopband filter.

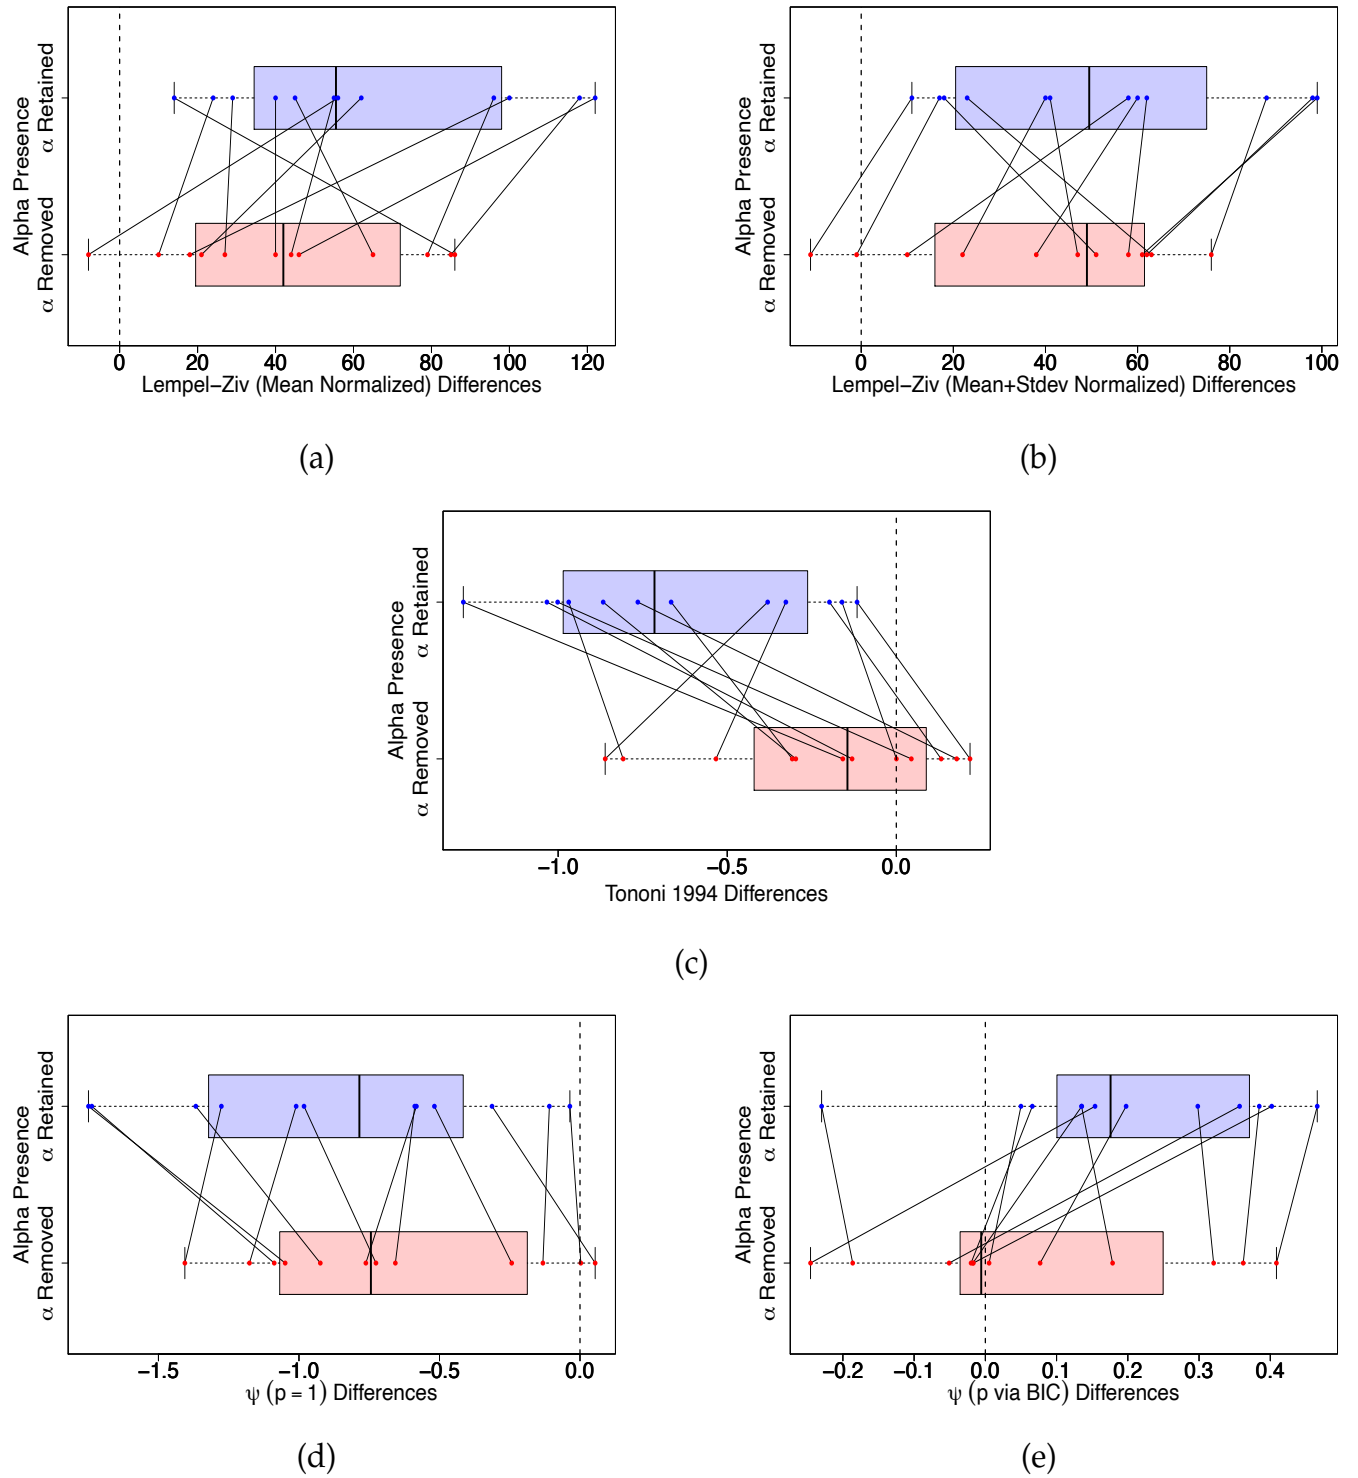

Figure S2. The difference scores for each measure across the subjects with (red) and without (blue) the alpha component removed. Solid lines match subjects between alpha retained and alpha removed conditions. The dash vertical line indicates no difference between the eyes-open and eyes-closed conditions.

**Table S5. Kendall's tau correlation  
Eyes Closed, Alpha Component Present**

|                  | LZ1    | LZ2    | $\Phi$  | $\psi p = 1$ | $\psi p$ via BIC |
|------------------|--------|--------|---------|--------------|------------------|
| LZ1              | 1.0000 | 0.7273 | -0.2424 | -0.0909      | 0.2424           |
| LZ2              |        | 1.0000 | -0.3333 | -0.3636      | 0.2121           |
| $\Phi$           |        |        | 1.0000  | 0.2424       | -0.1515          |
| $\psi p = 1$     |        |        |         | 1.0000       | -0.5455          |
| $\psi p$ via BIC |        |        |         |              | 1.0000           |

**Table S6. Kendall's tau correlation  
Eyes Closed, Alpha Component Removed**

|                  | LZ1    | LZ2    | $\Phi$  | $\psi p = 1$ | $\psi p$ via BIC |
|------------------|--------|--------|---------|--------------|------------------|
| LZ1              | 1.0000 | 0.6364 | -0.1818 | 0.0909       | 0.1818           |
| LZ2              |        | 1.0000 | -0.3030 | 0.0303       | 0.1212           |
| $\Phi$           |        |        | 1.0000  | -0.1212      | 0.0303           |
| $\psi p = 1$     |        |        |         | 1.0000       | -0.4242          |
| $\psi p$ via BIC |        |        |         |              | 1.0000           |

**Table S7. Kendall's tau correlation  
Eyes Open, Alpha Component Present**

|                  | LZ1    | LZ2    | $\Phi$  | $\psi p = 1$ | $\psi p$ via BIC |
|------------------|--------|--------|---------|--------------|------------------|
| LZ1              | 1.0000 | 0.9313 | -0.0763 | -0.4428      | 0.1679           |
| LZ2              |        | 1.0000 | -0.0606 | -0.3939      | 0.0909           |
| $\Phi$           |        |        | 1.0000  | 0.0000       | -0.2424          |
| $\psi p = 1$     |        |        |         | 1.0000       | -0.0909          |
| $\psi p$ via BIC |        |        |         |              | 1.0000           |

**Table S8. Kendall's tau correlation  
Eyes Open, Alpha Component Removed**

|                  | LZ1    | LZ2    | $\Phi$  | $\psi p = 1$ | $\psi p$ via BIC |
|------------------|--------|--------|---------|--------------|------------------|
| LZ1              | 1.0000 | 0.5198 | -0.0153 | -0.2595      | -0.1069          |
| LZ2              |        | 1.0000 | -0.0313 | -0.2189      | -0.0938          |
| $\Phi$           |        |        | 1.0000  | -0.2121      | -0.0606          |
| $\psi p = 1$     |        |        |         | 1.0000       | -0.1212          |
| $\psi p$ via BIC |        |        |         |              | 1.0000           |

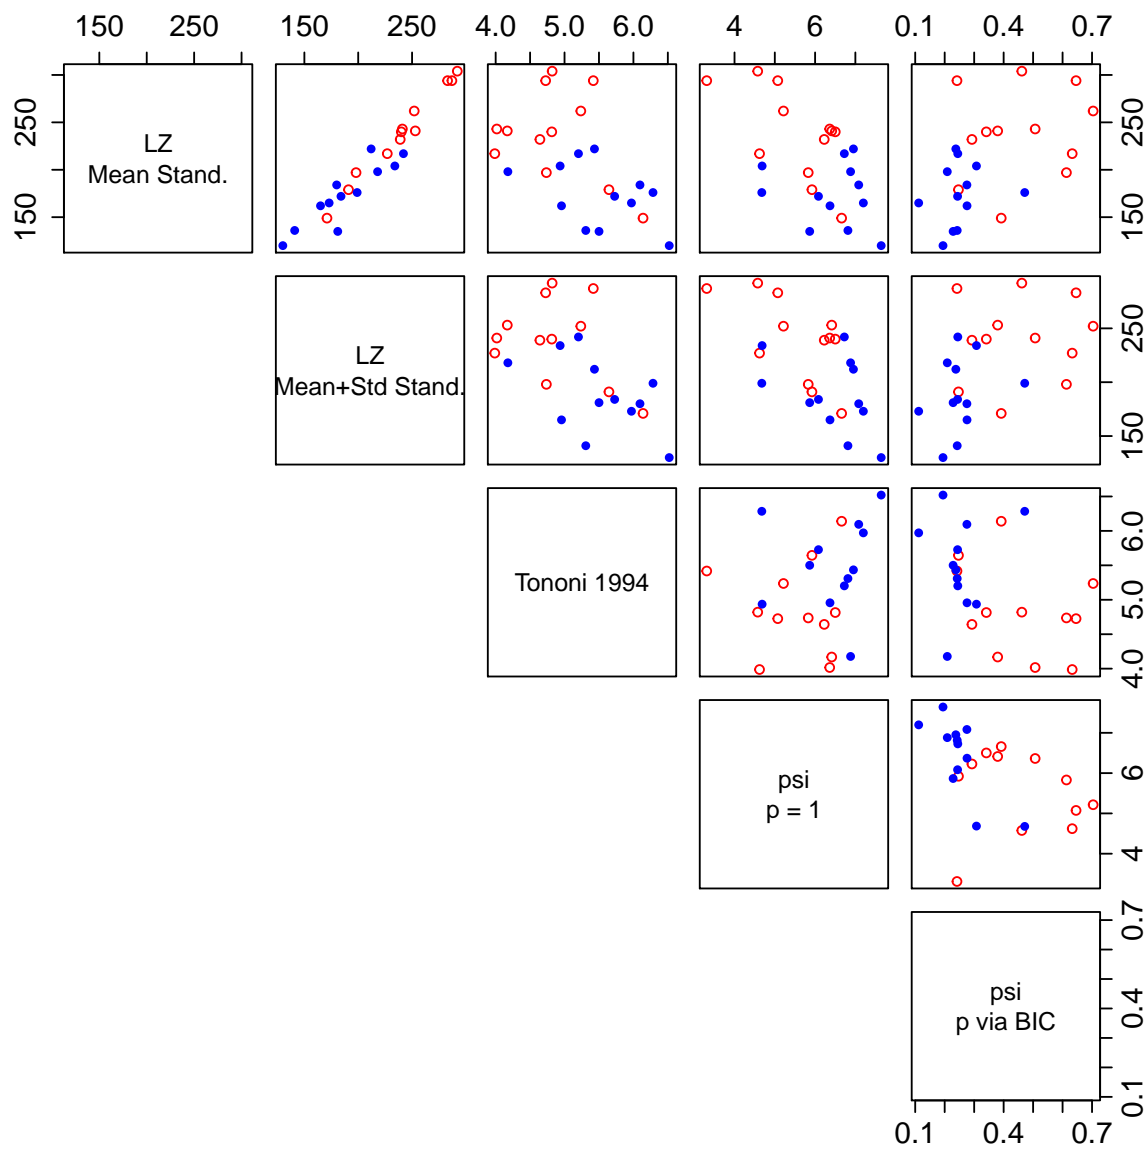

Figure S3. Within-subject associations between the measures in the eyes-open (open red points) and eyes-closed conditions (closed blue points) from signals containing the alpha component.



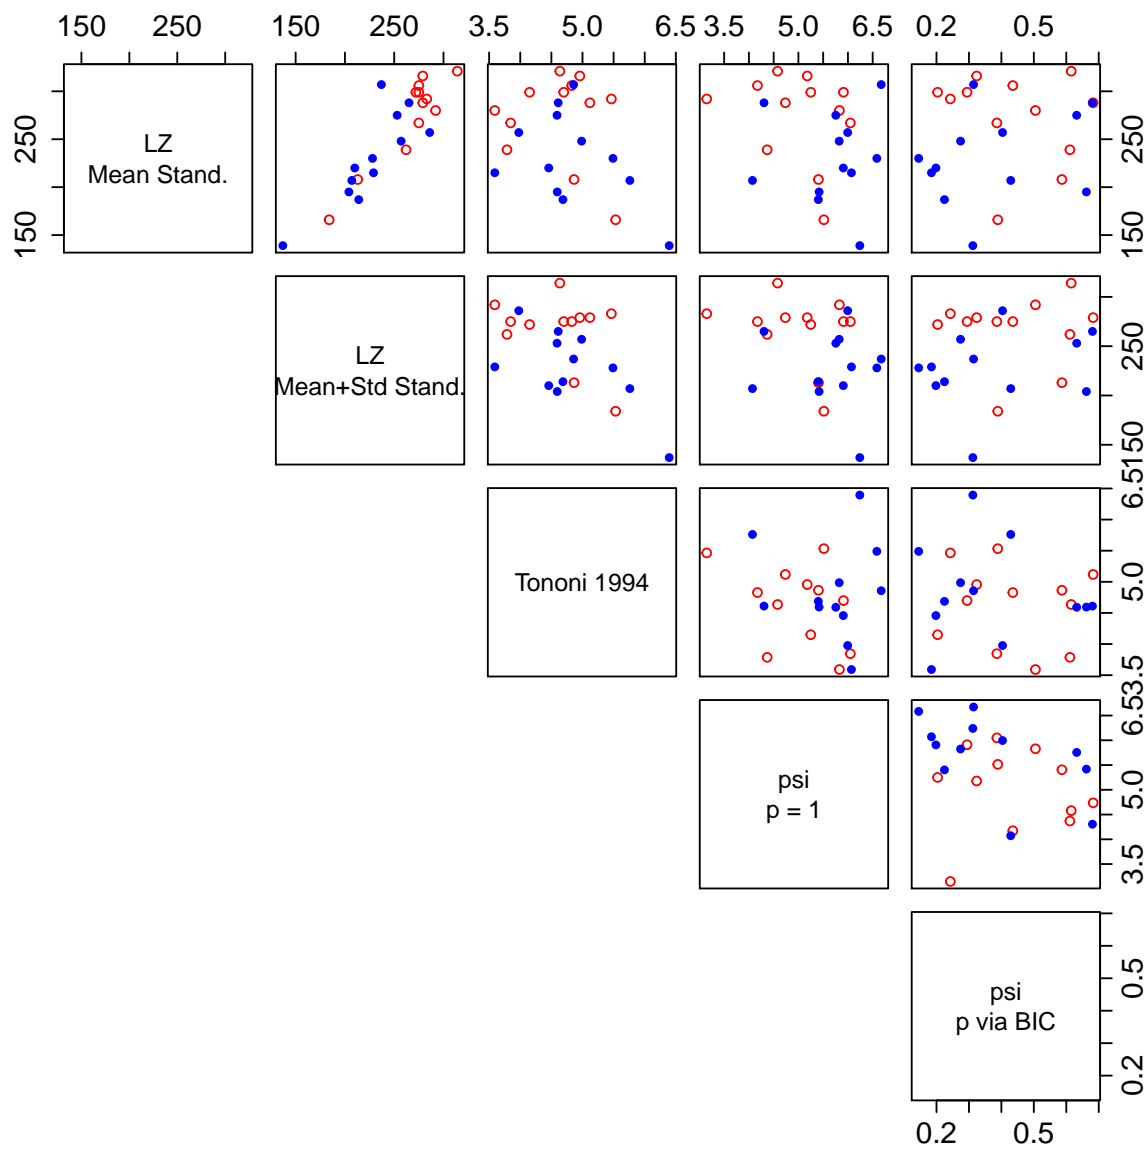

Figure S4. Within-subject associations between the measures in the eyes-open (open red points) and eyes-closed conditions (closed blue points). The alpha component has been removed.
